# Supplementary material for: Cobalt(ii) coordination polymers constructed from bis(N-pyrid-3-ylmethyl)adipoamide and polycarboxylic acids: reversible structural transformation upon proton delivery and removal
Source: Royal Society of Chemistry journal article supplement (doi:10.1039/d1ce01216a), 2021-01-01

## **Supplementary Materials**

### **Cobalt(II) coordination polymers constructed from bis(N-pyrid-3-ylmethyl)adipoamide and polycarboxylic acids: reversible structural transformation upon proton delivery and removal**

Ji-Hong Hu, Yuan-Chin Liu and Jhy-Der Chen\*

**Fig. S1.** (a) Simulated and (b) experimental PXRD patterns of **1**.

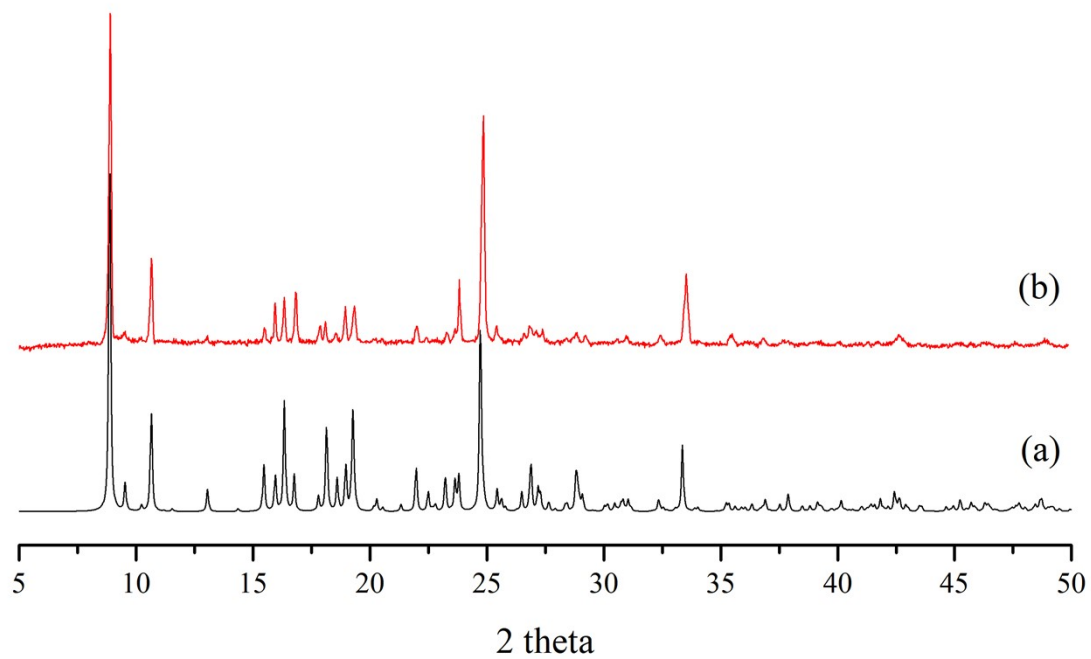

**Fig. S2.** (a) Simulated and (b) experimental PXRD patterns of **2**.

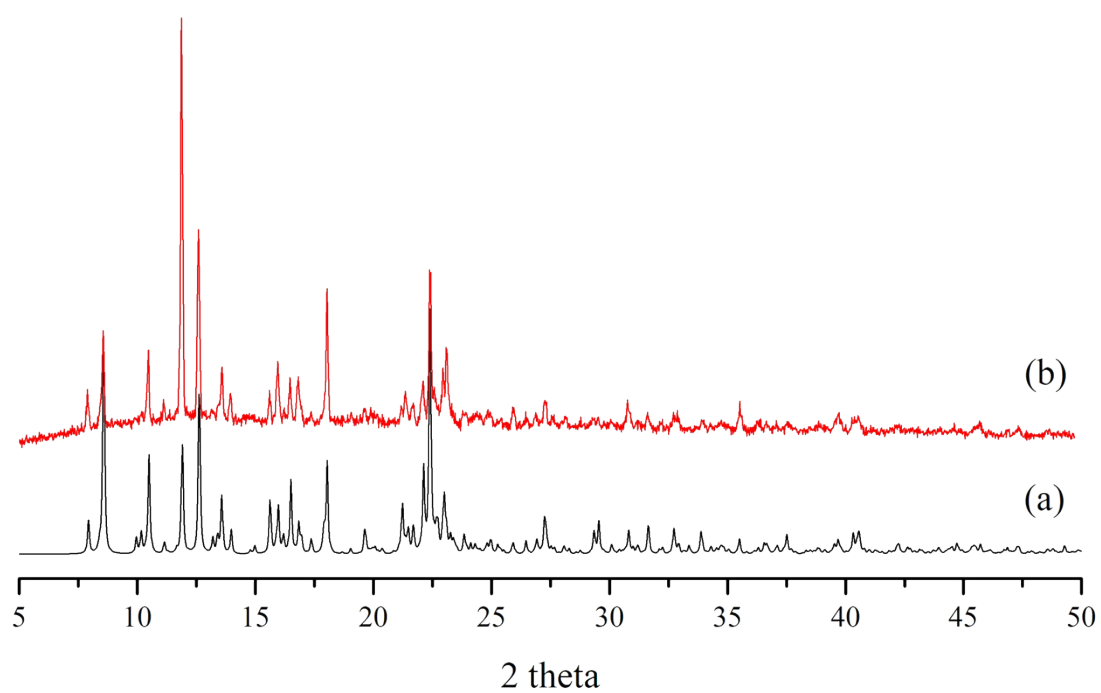

**Fig. S3.** (a) Simulated and (b) experimental PXRD patterns of **3**.

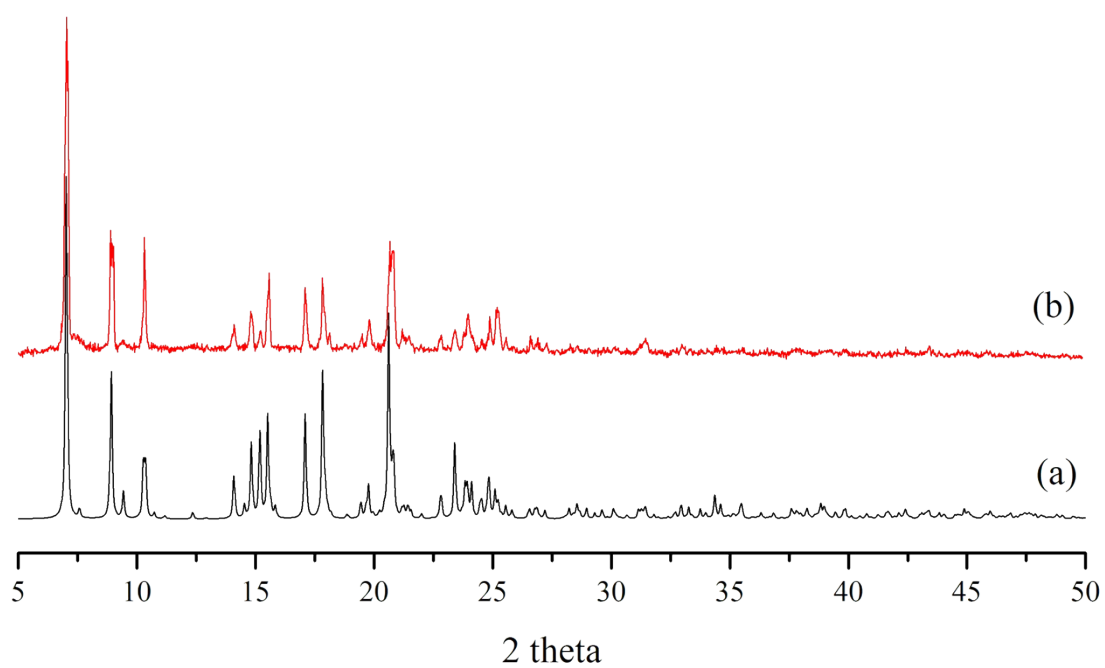

**Fig. S4.** (a) Simulated and (b) experimental PXRD patterns of **4**.

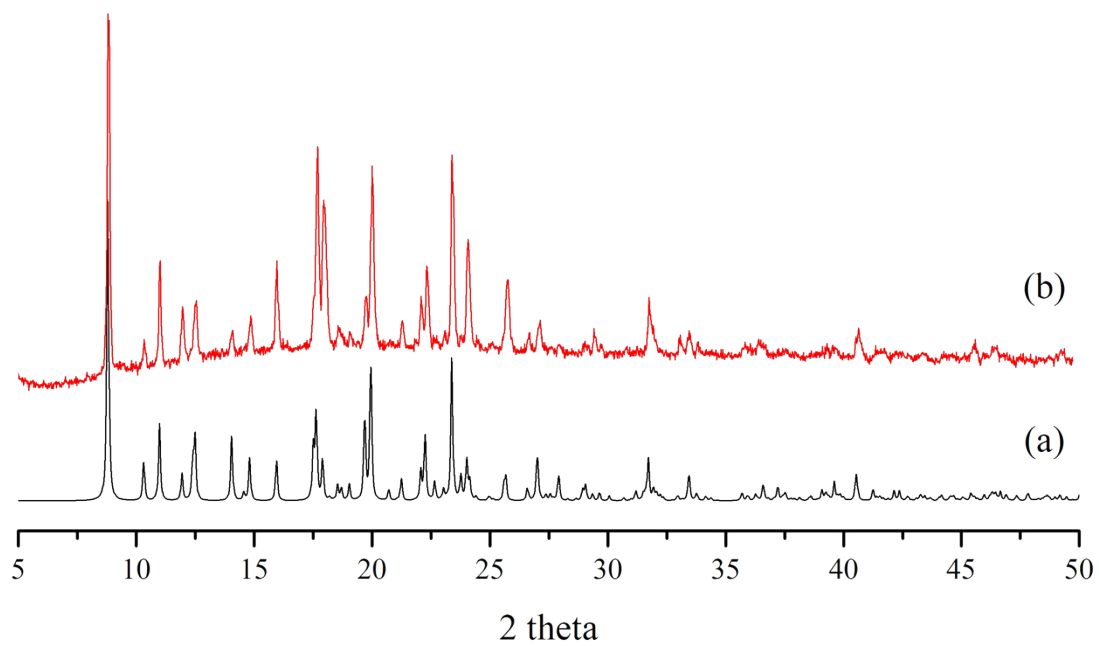

**Table S1.** H---O distances (Å) of hydrogen bonds with angles (°) in parenthesis for **1** – **4**.

| Complex              | <b>1</b>                 | <b>2</b>                               | <b>3</b>                               | <b>4</b>                               |
|----------------------|--------------------------|----------------------------------------|----------------------------------------|----------------------------------------|
| <sup>a</sup> N-H---O | 2.23 (175)               | 2.48 (138)                             | 2.16 (175)<br>2.40 (141)               | 2.01 (176)                             |
| <sup>b</sup> N-H---O |                          | 2.10 (151)<br>2.07 (156)               |                                        |                                        |
| <sup>c</sup> N-H---O |                          |                                        |                                        | 2.41 (112)<br>2.56 (158)<br>2.29 (158) |
| <sup>d</sup> N-H---O |                          |                                        |                                        |                                        |
| <sup>e</sup> O-H---O | 2.38 (170)               | 1.90 (147)<br>1.82 (162)<br>2.00 (130) | 1.83 (151)<br>2.43 (123)<br>1.79 (165) |                                        |
| <sup>f</sup> O-H---O | 2.02 (177)               | 1.98 (156)<br>2.00 (166)               | 1.98 (177)                             |                                        |
| <sup>g</sup> O-H---O | 2.21 (152)<br>2.66 (122) | 1.85 (173)<br>2.02 (165)               |                                        | 2.56 (157)                             |
| <sup>h</sup> O-H---O | 1.92 (171)               | 1.97 (161)<br>2.28 (160)               |                                        | 1.88 (162)                             |
| <sup>i</sup> O-H---O | 1.80 (165)               |                                        |                                        |                                        |
| <sup>j</sup> O-H---O |                          | 1.87 (157)<br>2.16 (129)<br>1.96 (143) |                                        |                                        |
| <sup>k</sup> O-H---O |                          | 2.09 (174)                             |                                        |                                        |
| <sup>l</sup> O-H---O |                          | 2.44 (131)<br>1.69 (169)               |                                        |                                        |

a from the amine hydrogen atoms of **L** to the carboxylate oxygen atoms;

b from the amine hydrogen atoms of **L** to the cocrystallized water oxygen atoms;

c from the amine hydrogen atoms of 5-NH<sub>2</sub>-IPA<sup>2-</sup> to the carboxylate oxygen atoms;

d from the amine hydrogen atoms of 5-NH<sub>2</sub>-IPA<sup>2-</sup> to the cocrystallized water oxygen atoms;

e from the coordinated water molecules to the carboxylate oxygen atoms

f from the coordinated water molecules to the amide oxygen atoms

g from the cocrystallized water molecules to the carboxylate oxygen atoms

h from the cocrystallized water molecules to the amide oxygen atoms

i from the carboxylate oxygen atoms to the cocrystallized water molecules

j from the coordinated water molecules to the cocrystallized water molecules

k from the cocrystallized water molecules to the coordinated water molecules

l from the cocrystallized water molecules to the cocrystallized water molecules

**Fig. S5.** Hydrogen bonds of complex 1.

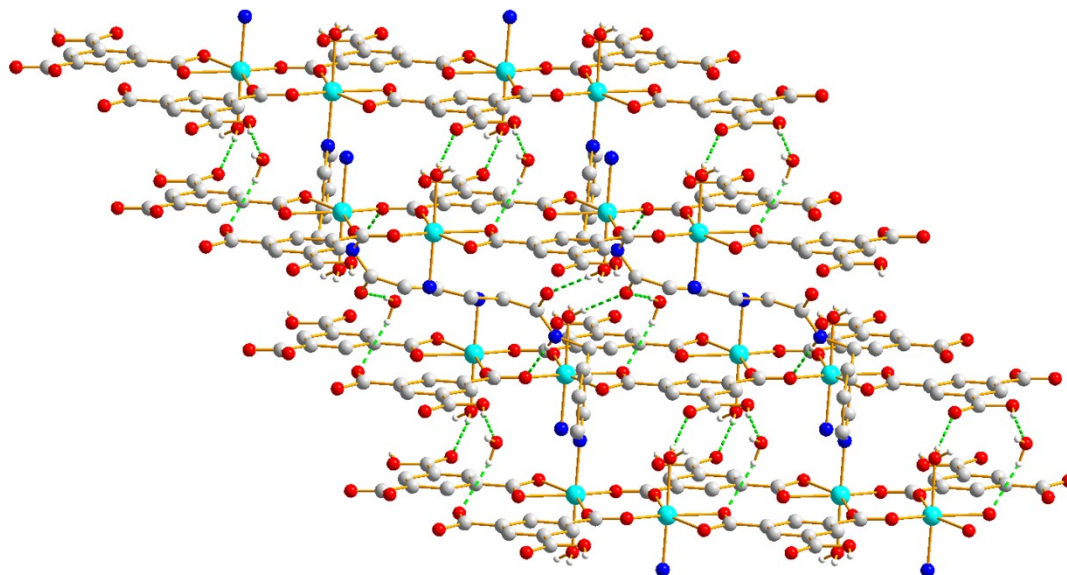

**Fig. S6.** Hydrogen bonds of complex 2.

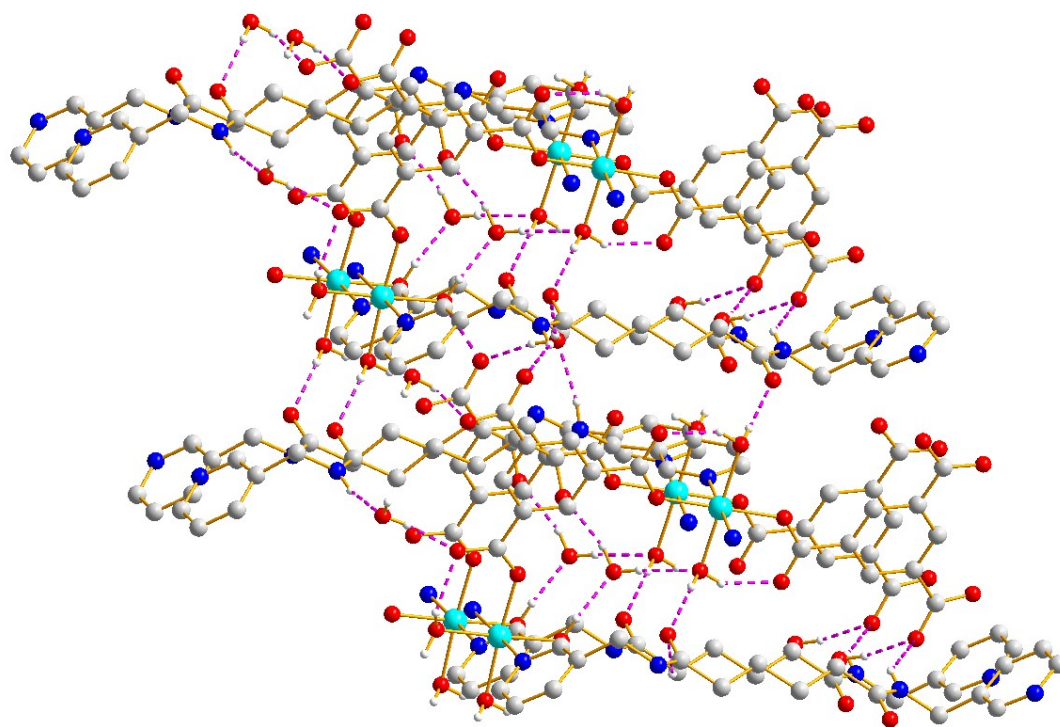



**Fig. S7.** Hydrogen bonds of complex **3**.

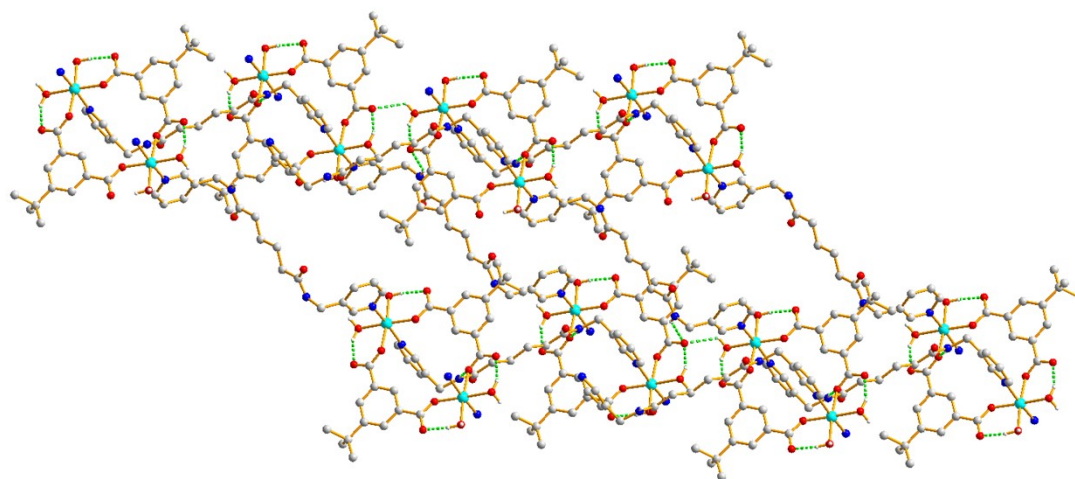

**Fig. S8.** Hydrogen bonds of complex 4.

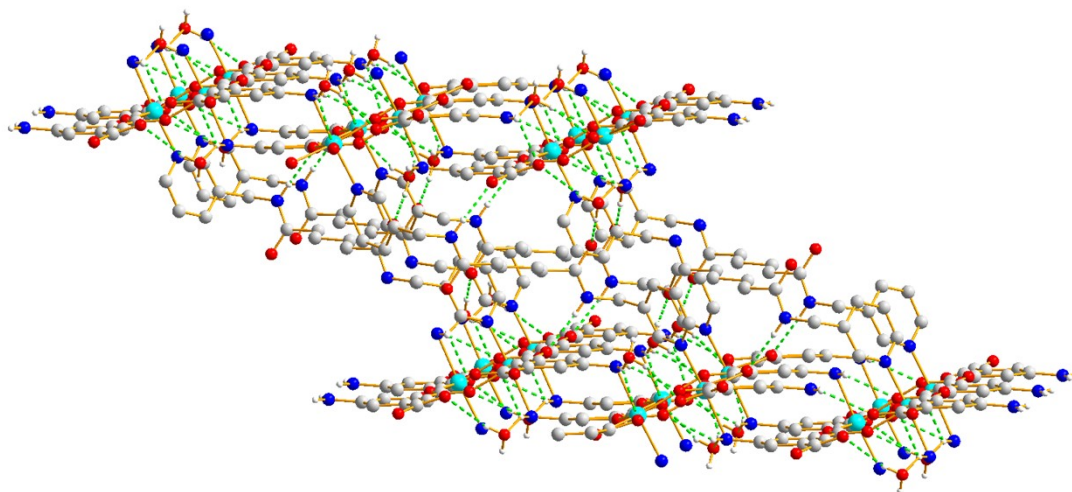

**Fig. S9.** The high resolution XPS spectra of Co 2p regions of (a)  $\text{Co}(\text{CH}_3\text{COO})_2 \cdot 4\text{H}_2\text{O}$ , (b) complex **1** and (c) complex **2**.

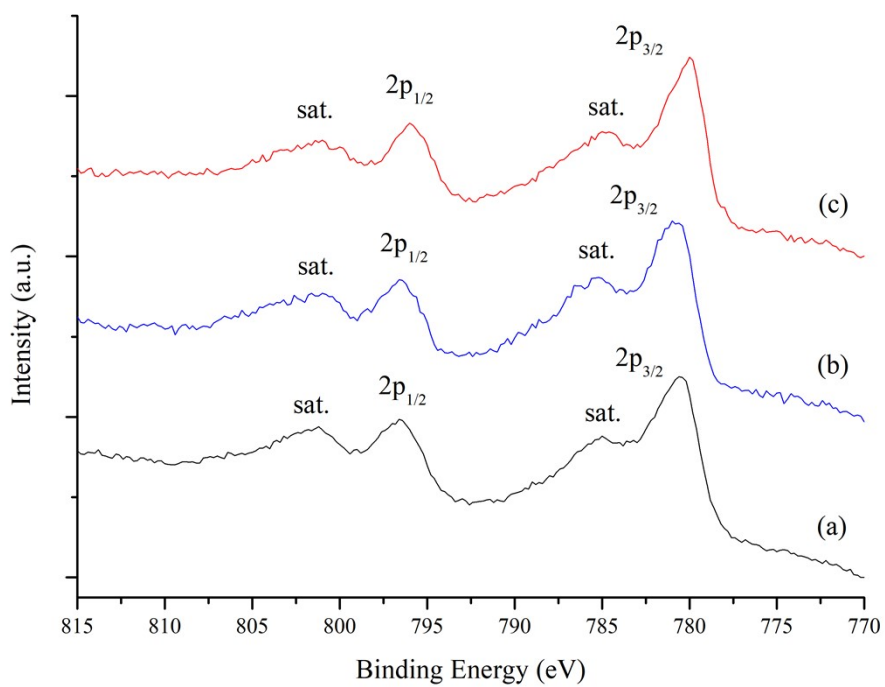

**Table S2.** Thermal properties of complexes **1 - 4**.

| Complex  | Weight loss<br>of solvent<br>°C<br>(calc/found),<br>% | Weight loss of ligand<br>°C (calc/found), %                            |
|----------|-------------------------------------------------------|------------------------------------------------------------------------|
| <b>1</b> | 2 H <sub>2</sub> O<br>130 ~ 175<br>(7.92/7.45)        | 0.5 L + 1,3,5-HBTC <sup>2-</sup><br>275 - 740<br>(79.57/79.81)         |
| <b>2</b> | 8 H <sub>2</sub> O<br>~ 120<br>(15.51/15.31)          | 1.5 L + 1,3,5-BTC <sup>3-</sup><br>250 - 600<br>(74.90/73.25)          |
| <b>3</b> | 2 H <sub>2</sub> O<br>105 ~ 190<br>(5.61/5.56)        | L + 5-tert-IPA <sup>2-</sup><br>275 - 695<br>(84.86/84.68)             |
| <b>4</b> | H <sub>2</sub> O<br>~ 200<br>(4.29/2.56)              | L + 5-NH <sub>2</sub> -IPA <sup>2-</sup><br>380 - 700<br>(81.65/82.58) |

**Fig. S10.** The TGA curve for complex **1**.

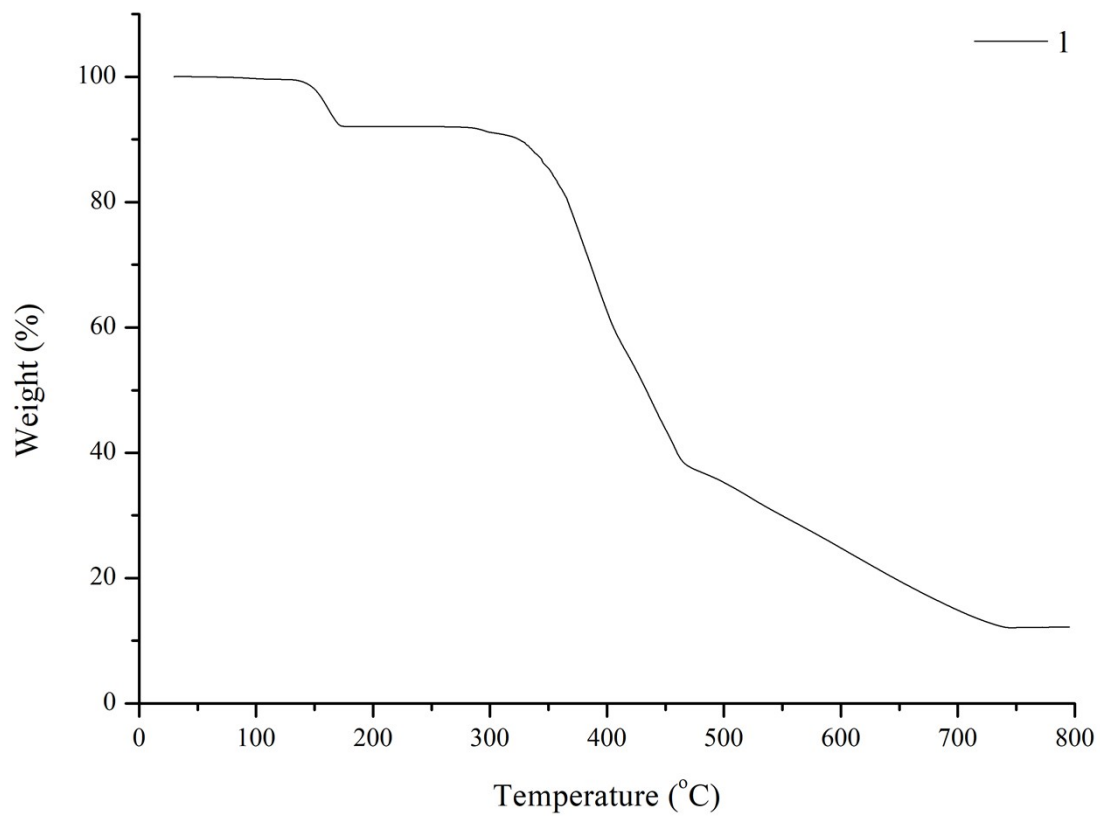

**Fig. S11.** The TGA curve for complex **2**.

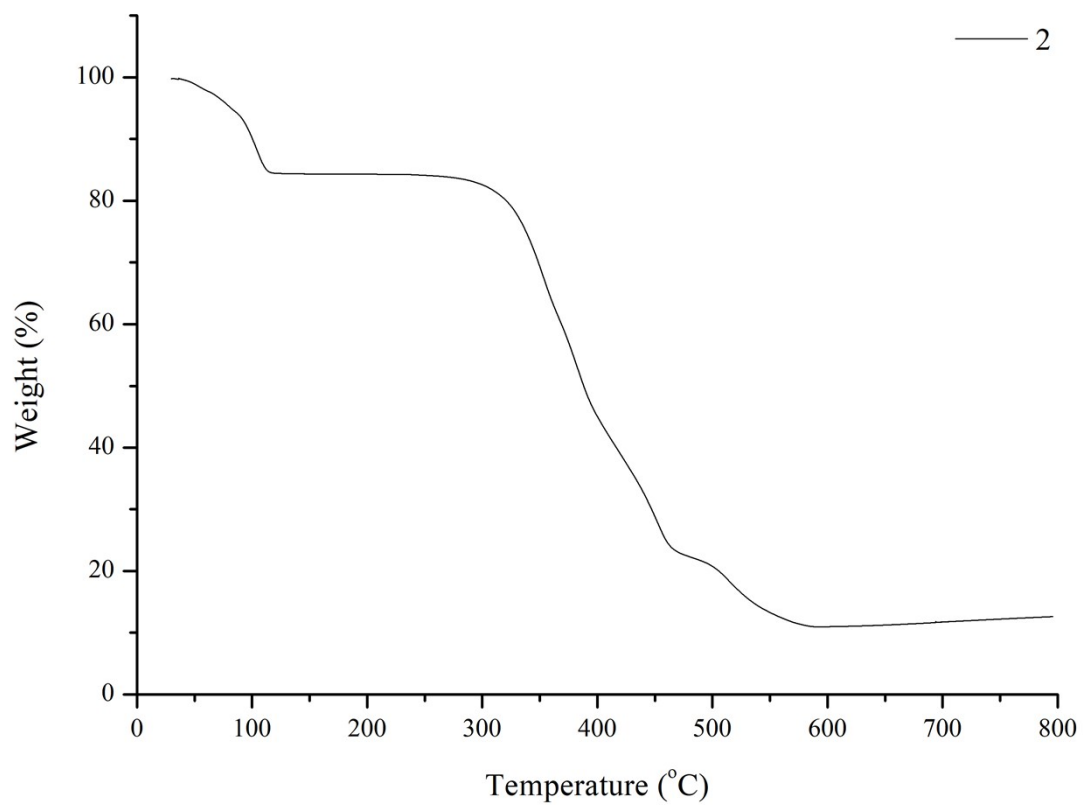

**Fig. S12.** The TGA curve for complex **3**.

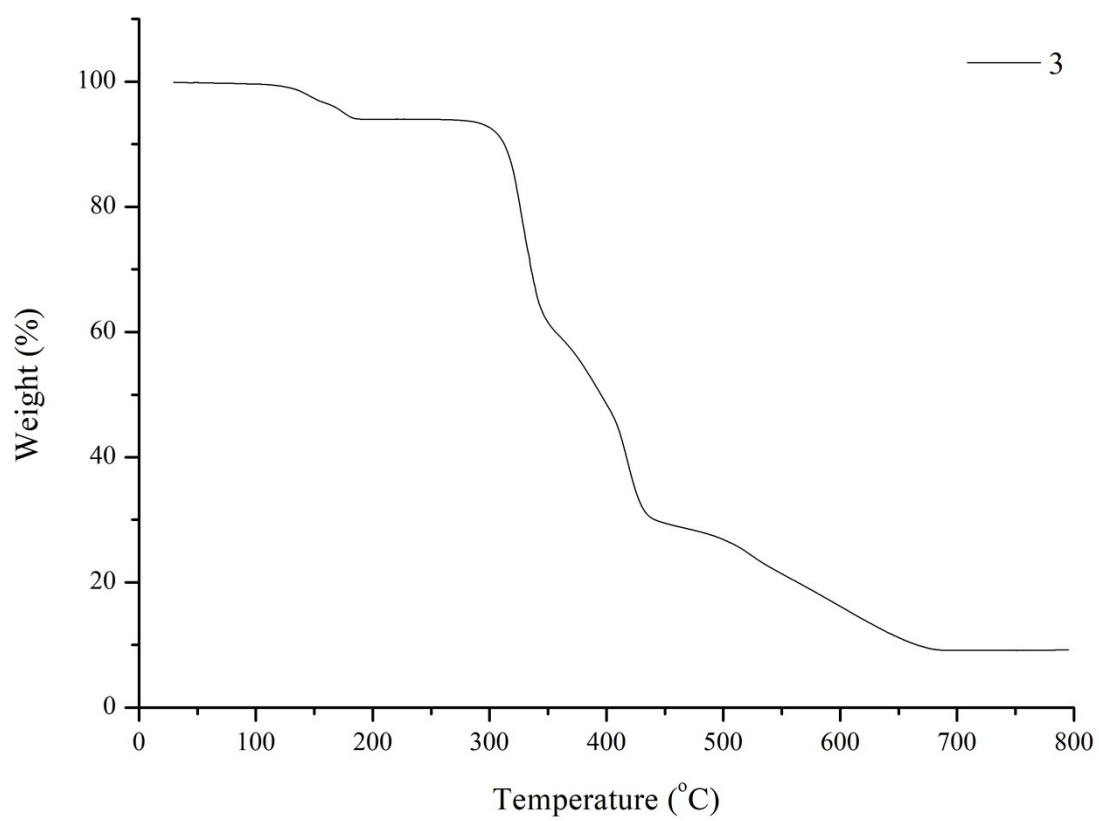

**Fig. S13.** The TGA curve for complex **4**.

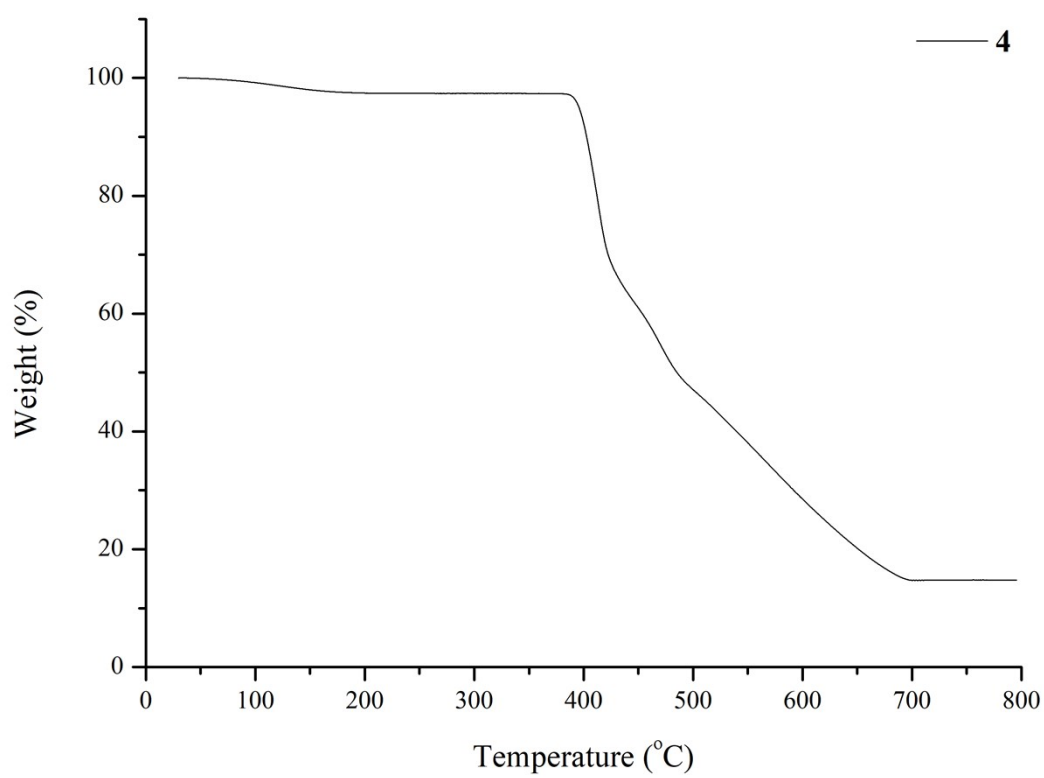



**Fig. S14.** PXRD patterns of complex **1** immersed in aqueous solutions with different pH values.

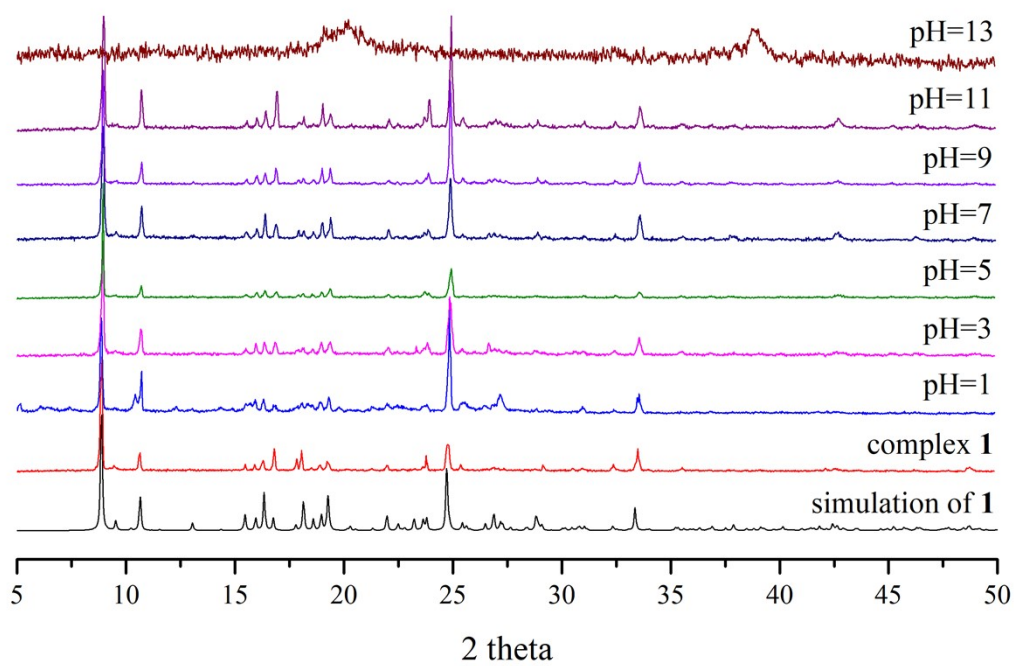

**Fig. S15.** PXRD patterns of complex **2** immersed in aqueous solutions with different pH values.

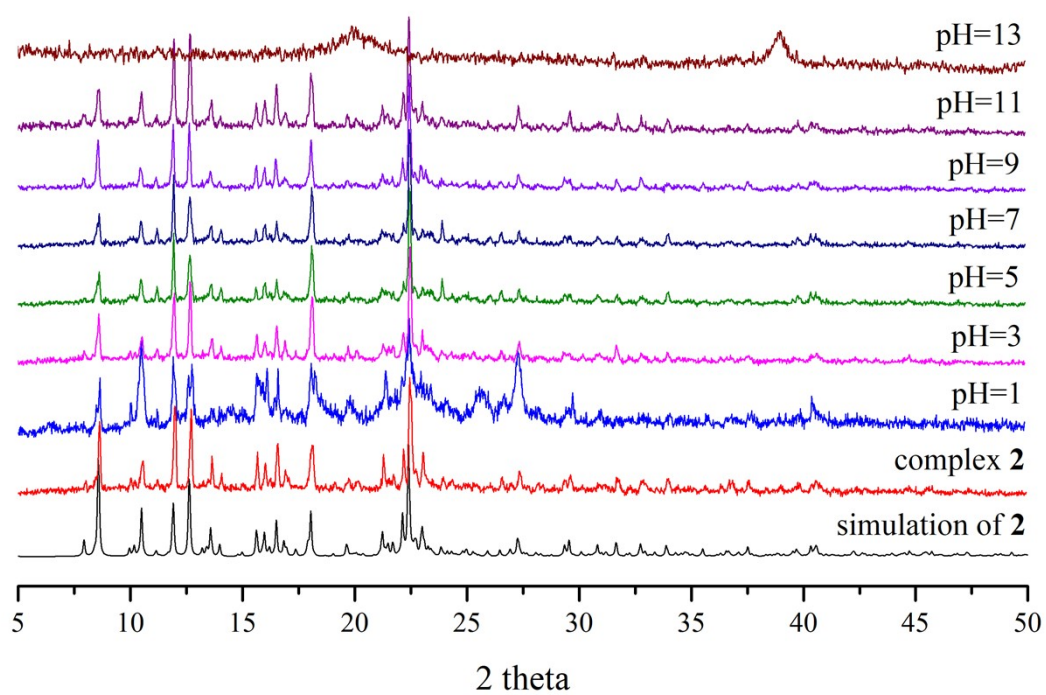

**Fig. S16.** PXRD patterns of complex **1**. (a) simulation, (b) as-synthesized and (c) heated at 175 °C for 1 h.

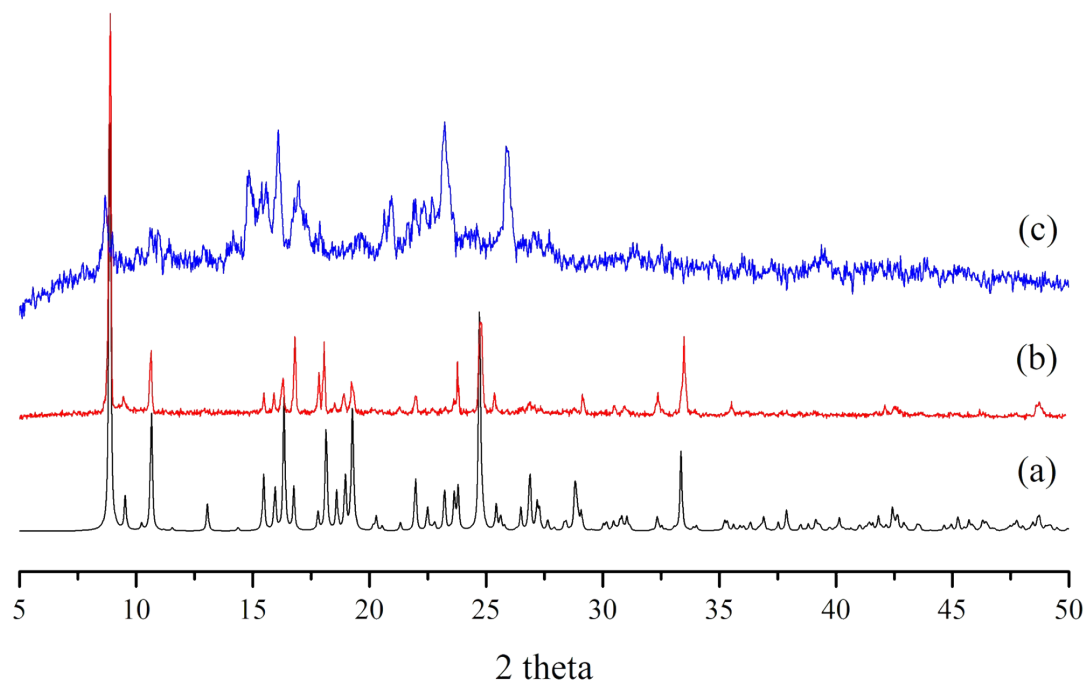

**Fig. S17.** PXRD patterns of complex **2**. (a) simulation, (b) as-synthesized and (c) heated at 120 °C for 1 h.

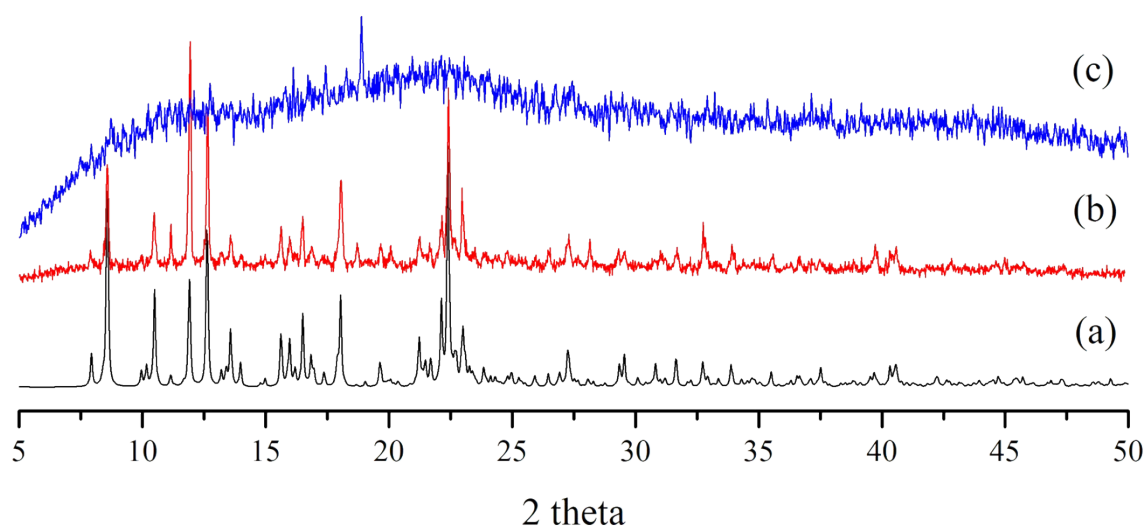

**Fig. S18.** PXRD patterns of complex **1**. (a) simulation, (b) as-synthesized, (c) heated at 175 °C for 1 h and then immersed in (d) water, (e) MeOH, (f) EtOH, (g) THF and (h) DMF.

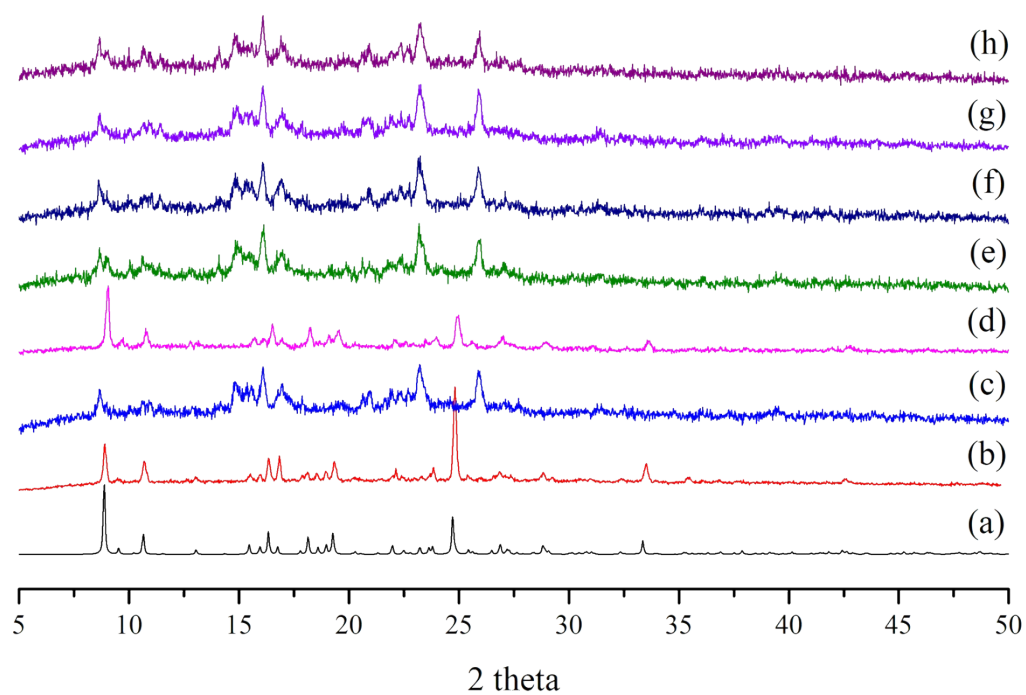

**Fig. S19.** PXRD patterns of complex **2**. (a) simulation, (b) as-synthesized, (c) heated at 120 °C for 1 h and then immersed in (d) water, (e) MeOH, (f) EtOH, (g) THF and (h) DMF.

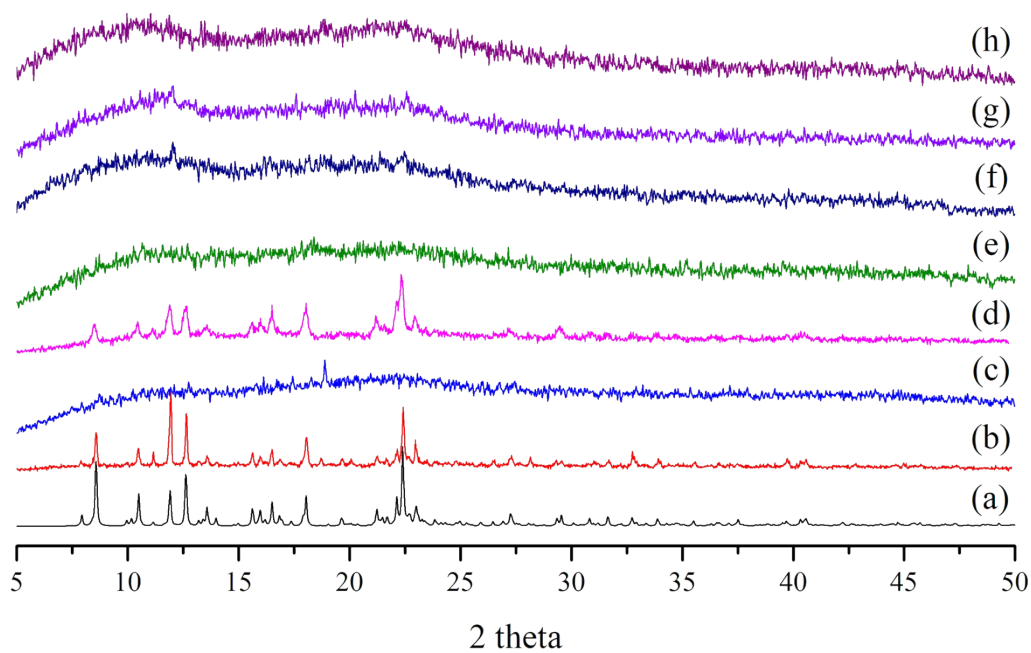

**Fig. S20.** PXRD patterns of complex **1** immersed in a variety of organic solvents.

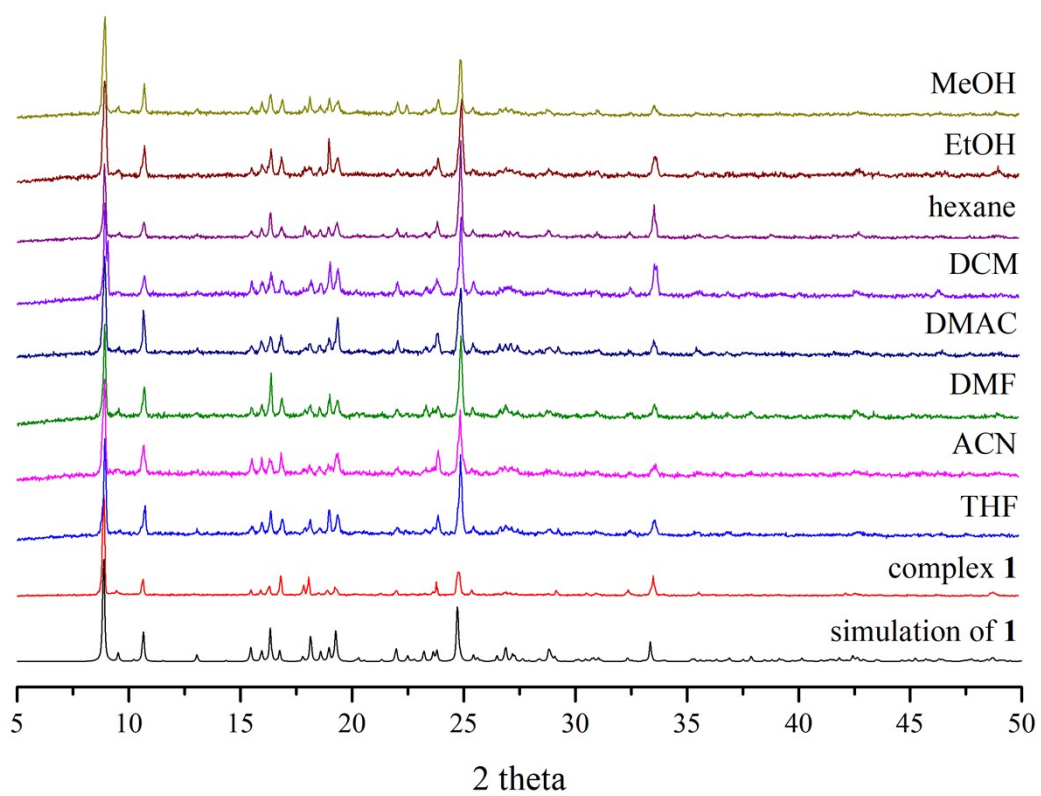

**Fig. S21.** PXRD patterns of complex **2** immersed in a variety of organic solvents.

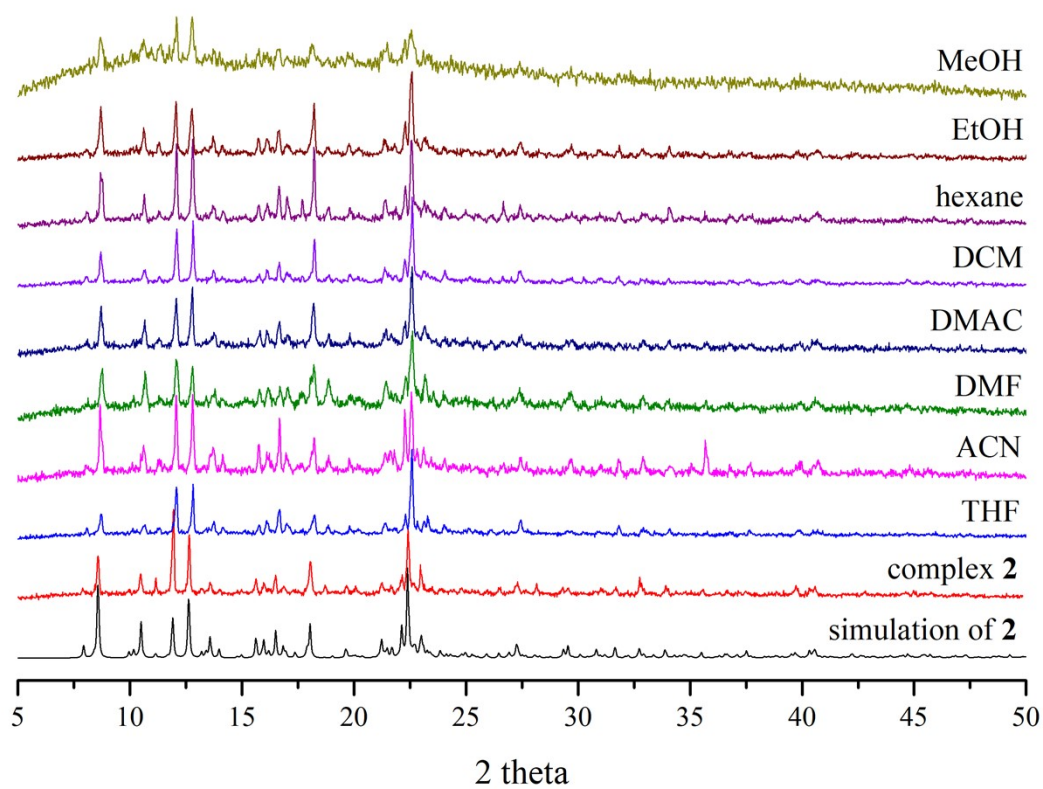



**Fig. S22.** PXRD patterns for **2**. (a) simulation, (b) as-synthesized, (c) heated in water at 120 °C for 2 days and (d) simulation of **1**.

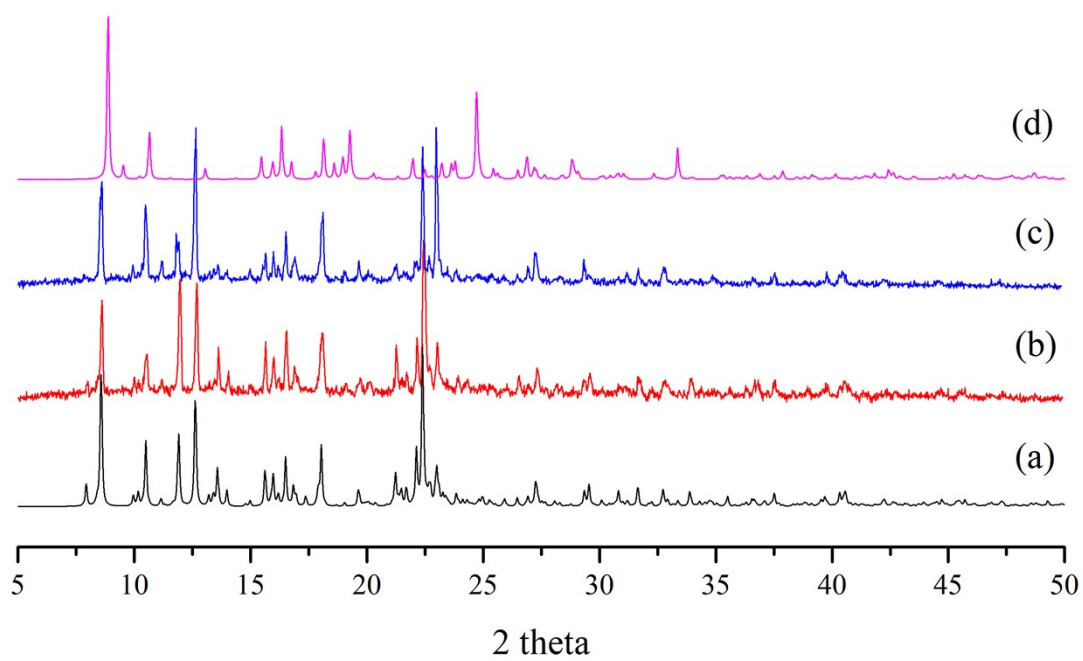

**Fig. S23.** PXRD patterns of **2**. (a) simulation, (b) as-synthesized and heated at 120 °C for 2 days in HCl solutions with pH values of (c) 1, (d) 3 and (e) 5 and (f) simulation of **1**.

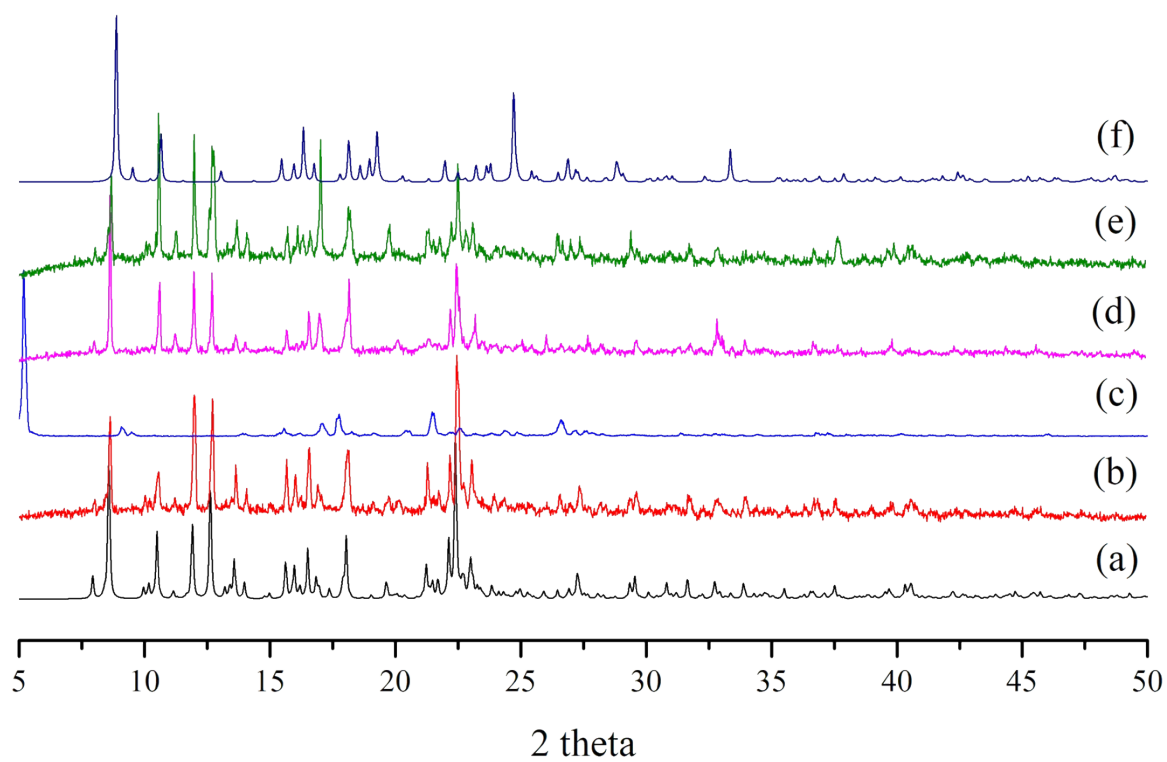

Supplement: d1ce01216a1.pdf [file d1ce01216a1.pdf]
